# Supplementary material for: Echogenic Advantages of Ferrogels Filled with Magnetic Sub-Microparticles
Source: MDPI journal article supplement (doi:10.3390/bioengineering8100140), 2021-10-11
Supplement: s1 [file s1]

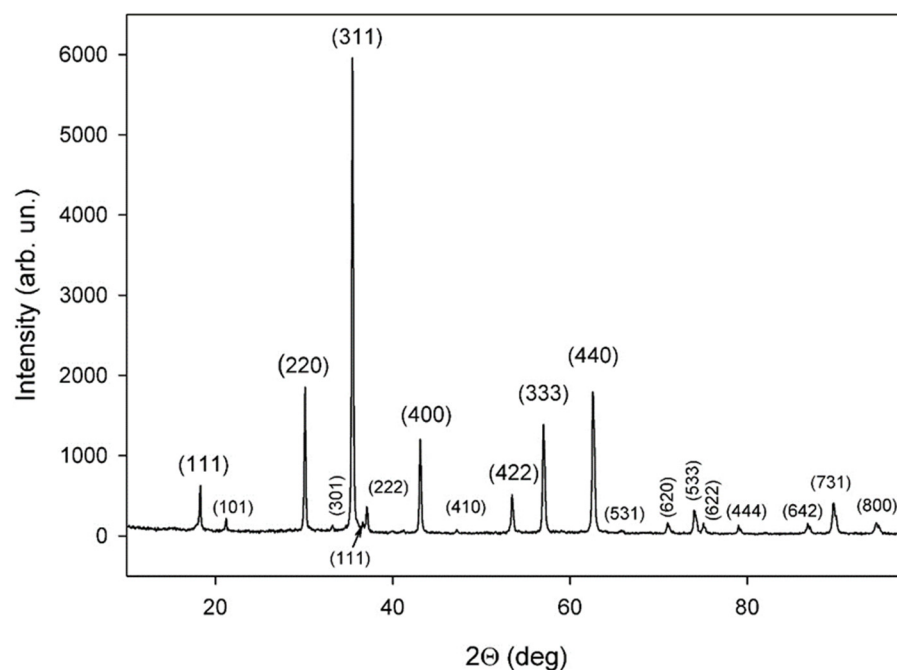

**Figure S1.** XRD plot of iron oxide sub-micron particles with corresponding Miller indexes.

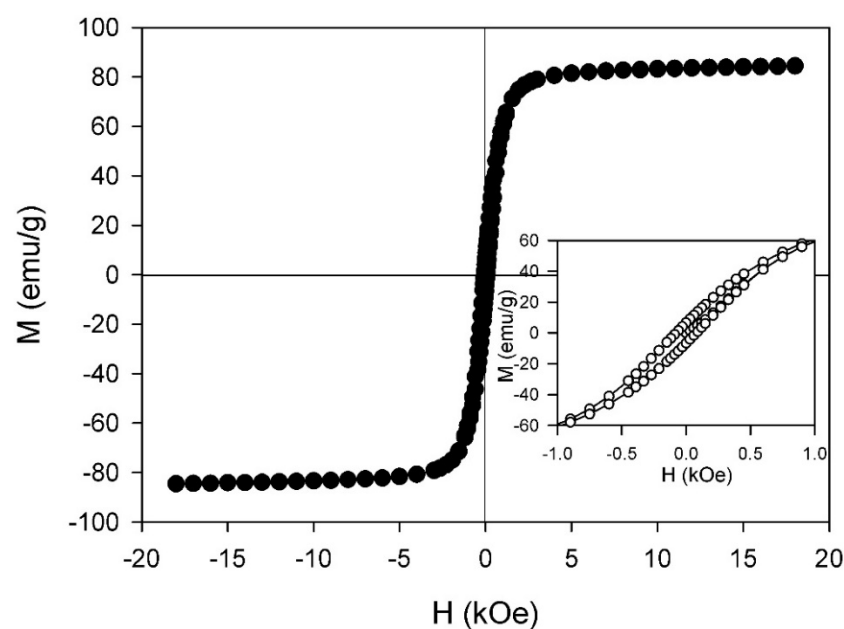

**Figure S2.** Magnetic hysteresis loop of iron oxide sub-micron particles. The inset shows the part of the loop in low field range.
